# Supplementary material for: Deep learning methods improve linear B-cell epitope prediction
Source: BioData Min. 2020 Apr 17;13:1. doi: 10.1186/s13040-020-00211-0 (PMC7371472; doi:10.1186/s13040-020-00211-0)
Supplement: Supplementary file 1 — Additional file 1. [file 13040_2020_211_MOESM1_ESM.r]

library(RCurl)
library(XML)
library(stringi)

A <- as.character("https://www.bioinf.ru/aappred/predict?seq=")

eseq = read.csv(file = "DLBEpitope20_test.csv")
eseq = as.character(as.matrix(eseq$DLBEpitope_seq))

test_res = c()

for (i in 1:length(eseq))
{
  cat(i, "\n")
  seq <- stri_c(eseq[i])
  
  url <- paste(A, seq, sep = "")
  
  web <- getURL(url)
  
  doc <- htmlTreeParse(
    web,
    encoding = "UA-53229485-1",
    error = function(...) {
      
    },
    useInternalNodes = TRUE,
    trim = TRUE
  )
  node <- getNodeSet(doc, "//table//tr//td/text()")
  x1 = sapply(node[3], xmlValue)
  x2 = sapply(node[4], xmlValue)
  test_res = rbind(test_res, c(x1, x2))
}

test_res=matrix(as.numeric(test_res),ncol = 2,byrow = FALSE)
